# Supplementary material for: Female rats are more vulnerable to binge drinking behavior in an operant self-administration paradigm: implication for transition to alcohol use disorders
Source: Research Square preprint supplement (doi:10.21203/rs.3.rs-8561890/v1), 2026-01-14
Supplement: Supplementary file 1 [file a481c38521a19976bab1ca57.docx]

**Additional materials**

***Clustering analysis***


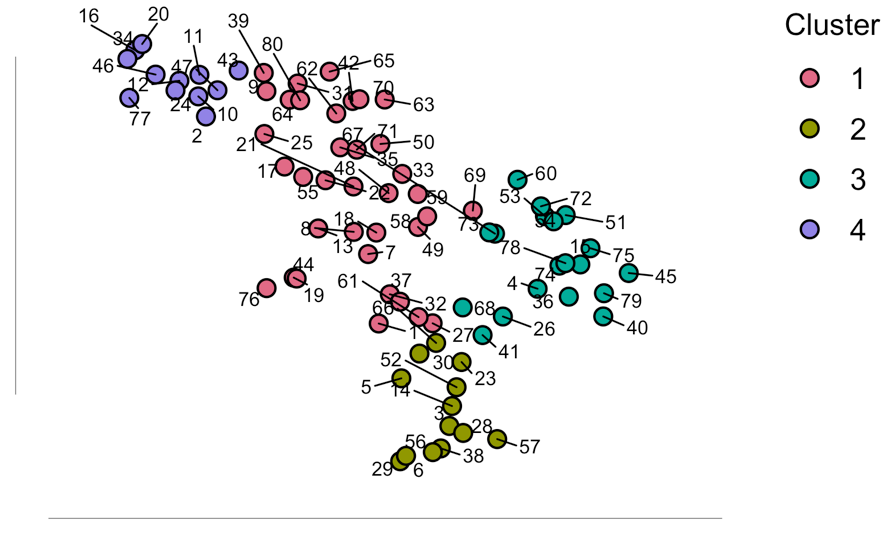

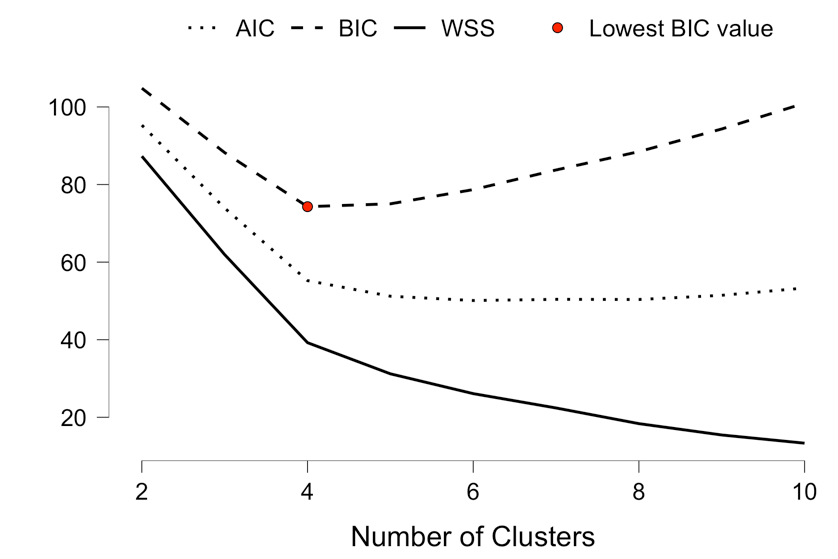


Additional Figure 1: Unbiased clustering analysis. Left: Elbow method for determining the number of clusters. Right: Scree plot of the four clusters based on consumption (g/kg) and time to achieve 50% of total rewards.

|  | | | | | | | | | | | |
| --- | --- | --- | --- | --- | --- | --- | --- | --- | --- | --- | --- |
| **Clusters** | | **N** | | **R²** | | **AIC** | | **BIC** | | **Silhouette** | |
| 4 |  | 80 |  | 0.752 |  | 55.240 |  | 74.290 |  | 0.430 |  |

Additional Table 1. Values enabling adjustment of the best model obtained from the K-means clustering method.
